# Supplementary material for: Inflammatory, Oxidative Stress, and Apoptosis Effects in Zebrafish Larvae after Rapid Exposure to a Commercial Glyphosate Formulation
Source: MDPI journal article supplement (doi:10.3390/biomedicines9121784), 2021-11-27
Supplement: s1 [file s1]

**Table S1 – Original values of biochemical parameters evaluated in zebrafish WT larvae with 72 hpf, exposed for 4:30 h to different chemicals**

| Biochemical parameters | Groups                      |                                           |                                |                             |                             | Statistical test            | p     |
|------------------------|-----------------------------|-------------------------------------------|--------------------------------|-----------------------------|-----------------------------|-----------------------------|-------|
|                        | Control (E3)                | CuSO <sub>4</sub> 2.5 µg mL <sup>-1</sup> | RF (µg a.i. mL <sup>-1</sup> ) |                             |                             |                             |       |
|                        |                             |                                           | 1                              | 5                           | 10                          |                             |       |
| ROS                    | 196 (178-204) <sup>a</sup>  | 272 (239-275) <sup>c</sup>                | 221 (206-232) <sup>ab</sup>    | 214 (191-247) <sup>ab</sup> | 246 (237-265) <sup>bc</sup> | χ <sup>2</sup> (4) = 17.130 | 0.02  |
| SOD                    | 10 ± 1.3 <sup>abc</sup>     | 8.8 ± 2.4 <sup>ab</sup>                   | 8.5 ± 1.1 <sup>a</sup>         | 12 ± 1.5 <sup>c</sup>       | 11.7 ± 1.2 <sup>bc</sup>    | F (4, 20) = 6.317           | 0.002 |
| CAT                    | 4.49 ± 0.8                  | 5 ± 0.4                                   | 3.2 ± 1.1                      | 5.1 ± 1                     | 3.9 ± 1                     | F (4, 20) = 4.646           | 0.08  |
| GPx                    | 2.6 ± 0.7                   | 1.8 ± 0.5                                 | 3.2 ± 0.8                      | 2.1 ± 1                     | 1.8 ± 0.5                   | F (4, 20) = 1.374           | 0.279 |
| GSH                    | 103 ± 9.9 <sup>ab</sup>     | 117 ± 18.1 <sup>b</sup>                   | 94 ± 11.7 <sup>b</sup>         | 89 ± 10.4 <sup>a</sup>      | 96 ± 4.9 <sup>ab</sup>      | F (4, 20) = 3.894           | 0.017 |
| GSSG                   | 668 ± 205                   | 612 ± 43                                  | 606 ± 160                      | 575 ± 179                   | 675 ± 66.4                  | F (4, 20) = 0.584           | 0.678 |
| OSI                    | 0.164 ± 0.038 <sup>ab</sup> | 0.19 ± 0.018 <sup>b</sup>                 | 0.165 ± 0.045 <sup>b</sup>     | 0.164 ± 0.044 <sup>ab</sup> | 0.1443 ± 0.013 <sup>a</sup> | F (4, 20) = 4.426           | 0.01  |
| GST                    | 13.3 ± 3.3                  | 13.8 ± 2.6                                | 15 ± 2.5                       | 11.2 ± 2.9                  | 10.1 ± 1.7                  | F (4, 20) = 2.292           | 0.095 |
| LPO                    | 2.51 ± 0.43 <sup>ab</sup>   | 1.85 ± 0.36 <sup>a</sup>                  | 2.31 ± 0.67 <sup>ab</sup>      | 2.83 ± 0.61 <sup>b</sup>    | 2.44 ± 0.62 <sup>ab</sup>   | F (4, 20) = 2.889           | 0.049 |
| LDH                    | 57.62 ± 3.1                 | 64.2 ± 10                                 | 58.72 ± 3.6                    | 59.32 ± 8.1                 | 59.94 ± 5.2                 | F (4, 20) = 0.193           | 0.940 |
| AChE                   | 17 ± 4.39                   | 13 ± 2.8                                  | 17.5 ± 4                       | 15.3 ± 4.1                  | 11.5 ± 2.1                  | F (4, 20) = 1.528           | 0.232 |
| NO                     | 5.87 ± 3.3 <sup>a</sup>     | 16.3 ± 3 <sup>b</sup>                     | 4.3 ± 3.4 <sup>a</sup>         | 7.1 ± 2.7 <sup>ab</sup>     | 9 ± 5.6 <sup>ab</sup>       | F (4, 15) = 4.317           | 0.016 |

Data from at least five independent replicates of 50 animals each, is expressed as mean ± SD for parametric data distribution or median (25th–75th quartile) for non-parametric data. Statistical analysis was performed using one-way ANOVA followed by Tukey's multiple-comparison test or Kruskal-Wallis followed by Dunn's test. Different letters indicate significant statistical differences between groups (*p* < 0.05).
